# Supplementary material for: Modulation in the Gene Expression Profile of Astrocytes and Monocytes by HIV-1 Nef Variants
Source: Preprints.org preprint supplement (doi:10.20944/preprints202202.0249.v1), 2022-02-21
Supplement: Supplementary file 2 [file supplementary]

Nef gene sequences submitted to Genbank

>MT337374.1 HIV-1 isolate IHDS-N1 from India nef protein (nef) gene, complete cds

ATGGGGGGCAAGTGGTCAAAAAGCAGCATAGTTGGATGGCCTGCTGTAAGAGAGAGAATGAAACGAACTG

AGCCAGCAGCAGAAGGAGTAGGAGCAGCGTCTCAAGACTTAGATAAATATGGAGCACTTACAAGTAGCAA

CACAGACACCAATAATGCTACTTGTGCCTGGCTGAGAGCACAAGAGGAGGAAGAAGGTGTAGGCTTTCCA

GTCAGACCTCAAGTGCCTTTAAGACCAATGACTTTTAAGGGAGCGGTCGATCTCAGCTCTTTTTTAAAAG

AAAAGGGGGGACTGGAAGGGTTAATTTACTCTAAGAAAAGGCAAGAGATCCTTGATTTGTGGGTCTATCA

CACACAAGGCTACTTCCCTGATTGGCAAAACTACACACCGGGACCAGGGACCAGATTCCCACTAACCTTT

GGGTGGTGCTTCAAGCTAGTACCAGTTGACCCAGGAGAAGTAGAAGAGGCCACCGAAGGAGAAGACAACT

GTTTGCTACACCCTGTGTGCCTGCATGGAATGGAGGATGAACATAAAGAAGTATTAAAGTGGAAGTTTGA

CAGTCACCTAGCACACACCCATATGGCCCGCCAGCTACATCCGGAGTATTACAAAGACTACTGA

>MT337374

MGGKWSKSSIVGWPAVRERMKRTEPAAEGVGAASQDLDKYGALTSSNTDTNNATCAWLRAQEEEEGVGFPVRPQVPLRPMTFKGAVDLSSFLKEKGGLEGLIYSKKRQEILDLWVYHTQGYFPDWQNYTPGPGTRFPLTFGWCFKLVPVDPGEVEEATEGEDNCLLHPVCLHGMEDEHKEVLKWKFDSHLAHTHMARQLHPEYYKDY

>MT337375.1 HIV-1 isolate IHDS-N2 from India nef protein (nef) gene, complete cds

ATGGGGGGCAAGTGGTCAAAAAGCAGCATAGTTGGATGGCCTGCTGTAAGGGAAAGAATAAGGCGAGCTG

AGCCAGCAGCAGAAGGAGTGGGAGCAGCATCTCAAGACTTAGATAAACATGGAGCACTTACAAGCAGCAA

CACAGACACCAATAATGCTGCTGGTGCCTGGCTGAGAGCACAAGAGGAGGAAGAAGAAGTAGGTTTTCCA

GTCAGACCTCAGGTGCCTTTAAGACCAATGACTTATAAGGATGCATTTGATCTCAGCTTCTTTTTAAAAG

AAAAGGGGGGACTGGAAGGGTTAATTTACTCCAGGAAAAGGCAAGAGATCCTTGATCTGTGGGTCTATAA

CACACAAGGCTTCTTCCCTGATTGGCAAAACTACACACCAGGACCAGGGGTCAGATTCCCACTGACCTTT

GGGTGGTGCTTCAAGCTAGTACCAGTTGACCCAGGAGAAGTAGAAGAGGCCAACGAAGGAGAAGACAACA

GCTTGTTACACCCTATATGCCAGCATGGAATGGATGACCACCACAGAGAAGTGTTAAAGTGGCAGTTTGA

CAGTCAGCTAGCATACAGACACAGAGCCCGCGAGCTACATCCGGAGTATTACAAAGACTGCTGA

>MT337375

MGGKWSKSSIVGWPAVRERIRRAEPAAEGVGAASQDLDKHGALTSSNTDTNNAAGAWLRAQEEEEEVGFPVRPQVPLRPMTYKDAFDLSFFLKEKGGLEGLIYSRKRQEILDLWVYNTQGFFPDWQNYTPGPGVRFPLTFGWCFKLVPVDPGEVEEANEGEDNSLLHPICQHGMDDHHREVLKWQFDSQLAYRHRARELHPEYYKDC

>MT337376.1 HIV-1 isolate IHDS-N3 from India nef protein (nef) gene, complete cds

ATGGGGGGCAAGTGGTCAAAACGCAGCATAGTTGGATGGCCTAATATAAGAGAGAGAATGAGACGAGCTG

AGCCAGCAGCAGAAGGAGTGGGAGCAGCGTCTCAAGACTTAGATAAATATGGAGCACTTACCAGTAGCAA

CACAGCCACCACTAATGCTGATTGTGCTTGGCTGGAAGCGCAAGAGGAGGAAGAAGAAGTAGGCTTTCCA

GTCAGACCTCAGGTGCCTTTAAGACCAATGACTTACAAGGGAGCATTTGATCTCAGCTTCTTTTTAAGAG

AAAAGGGGGGACTGGAAGGGTTAATTTACTCTAAGAAAAGGCAAGAGATCCTTGATTTGTGGGTCTATCA

CACACAAGGCTACTTCCCTGACTGGCAAAACTACACACCGGGACCAGGGGAAAGATTCCCACTGACTTTT

GGGTGGTGCTTCAAGCTGGTACCAGTTGACCCAAGGGAAGTAGAAGAGGCCAACGAAGGAGAAGACAACC

GTTTGCTACACCCTGTGTGCCAGCATGGAATGGATGATGAACACAGAGAAGTATTAAGATGGAAGTTTGA

CATTCAACTAGCACACAGACACAGGGCCCGCGAGCTACATCCGGAGTATTACAAAGACTGCTGA

>MT337376

MGGKWSKRSIVGWPNIRERMRRAEPAAEGVGAASQDLDKYGALTSSNTATTNADCAWLEAQEEEEEVGFPVRPQVPLRPMTYKGAFDLSFFLREKGGLEGLIYSKKRQEILDLWVYHTQGYFPDWQNYTPGPGERFPLTFGWCFKLVPVDPREVEEANEGEDNRLLHPVCQHGMDDEHREVLRWKFDIQLAHRHRARELHPEYYKDC

>MT337377.1 HIV-1 isolate IHDS-N4 from India nef protein (nef) gene, complete cds

ATGGGGGGCAAGTGGTCAAAAAGTAGCATAGTAGGATGGCCTGCTGTAAGAGAGAGAATGAGACGTACTG

AGCCAGCAGCAGAAGGAGTAGGAGCAGCGTCTCAAGACTTAGATAAACATGGGGCACTTACAAGCAGCAA

CACAGACACCAATAATGCAGATTGTGCCTGGCTGAGAGCACAAGAAGAAGAAGAAGGAGTAGGCTTTCCA

GTCAAACCCCAGGTGCCTTTAAGACCAATGACTTATAAGGGAGCATTCGATCTCAGCTTCTTTTTAAAAG

AAAAGGGGGGACTGGATGGGTTAATTTACTCCAAGAAAAGGCAAGAGATCCTTGATCTGTGGGTCTATCA

CACACAAGGCTTCTTCCCTGATTGGCAAAACTATACACCGGGACCAGGGACCAGATTCCCACTGACCTTT

GGGTGGTGCTTCAAGCTAGTACCAGTTGATCCACAGGAAGTAGAAGAAGCCAACGAAGGAGAAAACAACA

GTTTGCTACACCCTGTGTGCCAGCATGGAATGGATGATGAACACAAAGAAGTATTACAGTGGAAGTTTGA

CAGTCTCCTCGCACACAGACACATGGCCCGCGAGCTACATCCGGAGTTTTACAAAGACTGCTGA

>MT337377

MGGKWSKSSIVGWPAVRERMRRTEPAAEGVGAASQDLDKHGALTSSNTDTNNADCAWLRAQEEEEGVGFPVKPQVPLRPMTYKGAFDLSFFLKEKGGLDGLIYSKKRQEILDLWVYHTQGFFPDWQNYTPGPGTRFPLTFGWCFKLVPVDPQEVEEANEGENNSLLHPVCQHGMDDEHKEVLQWKFDSLLAHRHMARELHPEFYKDC

>MT337378.1 HIV-1 isolate IHDS-N5 from India nef protein (nef) gene, complete cds

ATGGGGGGCAAGTGGTCAAAATGCAGCATAGTTGGATGGCCTGAGATAAGAGAGAGAATAAGACGAACTG

AGCCAGCAGCAGAAGGAGTAGGAGCAGCGTCTCAAGACTTAGATAAACATGGAGCACTTACCACCAGCAA

CACAAGCACCACCAATGCTGCTTGTGCTTGGCTGGAAGCGCAAGAGGAAGAAGACGTAGGCTTTCCAGTC

AGACCTCAGGTGCCTTTAAGACCAATGACTTTTAAGGGAGCATTTGATCTCAGCTTCTTTTTAAAAGAAA

AGGGGGGACTGGAAGGGTTAATTTACTCTAAGAAAAGGCAAGAGATCCTTGATTTGTGGGTCTATCACAC

ACAAGGCTACTTCCCTGACTGGCAAAACTACACACCGGGACCAGGGGTCAGATTCCCACTGACCTTTGGG

TGGTGCTTCAAGCTGGTACCAGTTGACCCAAGGGAAGTAGAAGAAGCCAACGAAGGAGAAGACAACTGTT

TGCTACACCCTATGAGCCAGTATGGAATGGAGGATGAACACAGAGAAGTATTAAAGTGGAAGTTTGACAG

CCAACTAGCATACACCCACAGGGCCCGTGAGCTACATCCGGAGTTCTACAAAGACTGCTGA

>MT337378

MGGKWSKCSIVGWPEIRERIRRTEPAAEGVGAASQDLDKHGALTTSNTSTTNAACAWLEAQEEEDVGFPVRPQVPLRPMTFKGAFDLSFFLKEKGGLEGLIYSKKRQEILDLWVYHTQGYFPDWQNYTPGPGVRFPLTFGWCFKLVPVDPREVEEANEGEDNCLLHPMSQYGMEDEHREVLKWKFDSQLAYTHRARELHPEFYKDC

>MT337379.1 HIV-1 isolate IHDS-N6 from India nef protein (nef) gene, complete cds

ATGGGGGGCAAGTGGTCAAAAAGCAGCATAGTTGGATGGCCTGCTGTAAAAGAGAGAATAAGGAGAACTG

AGCCAGCAGCAGAAGGAGTAGGACCAGCGTCTCAAGACTTAGATAAACATGGAGCACTTACAAGTAGCAA

CACAGAAACCACTAATGCTGCTTGTGCCTGGCTGAGAGCACAAGAGGAGGAAGGAGATGTAGGCTTTCCA

GTCAGACCACAAGTGCCTTTAAGACCAATGACTTACAAGGGAGCAGTAGATCTCAGCTTCTTTTTAAAAG

AAAAGGGGGGACTGGAAGGGTTAATTTACTCCAGGAAAAGGCAAGATATTCTTGATTTGTGGGTCTACAA

TACACAAGGCTACTTCCCTGATTGGCACAACTACACACCAGGACCAGGGACCAGATTCCCAATGACCTTT

GGGTGGTGCTTCAAGCTAGTACCAGTTGACCCAAGGGAAGTAGAAGAGGCCAACGAAGGAGAAGACAACT

GTTTGCTACACCCTATGTGCCAGCATGGACTGGAGGATGAACACAGAGAAGTATTAGTGTGGAAGTTTGA

CAGTCACCTAGCACACAGACACATGGCCCGCGAGCTACATCCGGAGTTCTACAAAGACTGCTGA

>MT337379

MGGKWSKSSIVGWPAVKERIRRTEPAAEGVGPASQDLDKHGALTSSNTETTNAACAWLRAQEEEGDVGFPVRPQVPLRPMTYKGAVDLSFFLKEKGGLEGLIYSRKRQDILDLWVYNTQGYFPDWHNYTPGPGTRFPMTFGWCFKLVPVDPREVEEANEGEDNCLLHPMCQHGLEDEHREVLVWKFDSHLAHRHMARELHPEFYKDC

>MT337380.1 HIV-1 isolate IHDS-N7 from India nef protein (nef) gene, complete cds

ATGGGGGGCAAGTGGTCAAAAAGCAGCATAGTAGGATGGCCTGCTGTAAGAGAGAGAATGAGAGGTACTG

AGCCAGCAGCAGAAGGAGTAGGAGCAGCGTCTCAAGACTTAGATAAACATGGGGCACTTACAAGCAGCAA

CACAGACACCAATAATGCAGATTGTGCCTGGCTGAGAGCACAAGAAGAAGAAGAAGGAGTAGGCTTTCCA

GTCAGACCCCAGGTGCCTTTAAGACCAATGACTTATAAGGGAGCATTCGATCTCAGCTTCTTTTTAAAAG

AAAAGGGGGGACTGGATGGGTTAATTTACTCCAAGAAAAGGCAAGAGATCCTTGATCTGTGGGTCTATCA

CACACAAGGCTACTTCCCTGATTGGCAAAACTATACACCGGGACCAGGGACCAGATTCCCACTGACCTTT

GGGTGGTGCTTCAAGCTAGTACCAGTTGATCCACAGGAAGTAGAAGAAGCCAACGAAGGAGAAAACAACA

GTTTGCTACACCCTGTGTGCCAGCATGGAATGGATGATGAACACAGAGAAGTATTACAAAGACTGCTGAG

CGGCCGCTTCTTATACAGACACATGGCCCGCGAGCTACATCCGGAGTTTTACAAAGACTGCTGA

>MT337380

MGGKWSKSSIVGWPAVRERMRGTEPAAEGVGAASQDLDKHGALTSSNTDTNNADCAWLRAQEEEEGVGFP

VRPQVPLRPMTYKGAFDLSFFLKEKGGLDGLIYSKKRQEILDLWVYHTQGYFPDWQNYTPGPGTRFPLTF

GWCFKLVPVDPQEVEEANEGENNSLLHPVCQHGMDDEHREVLQRLLSGRFLYRHMARELHPEFYKDC

>MT337381.1 HIV-1 isolate IHDS-N8 from India nef protein (nef) gene, complete cds

ATGGGGGGCAAGTGGTCAAAATGCAGCATAGTAGGATGGCCTGCTATAAGAGAGAGAATGAGACGAGCTG

AGCCAGCAGCAGAAGGAGTAGGAGCAGCGTCTCAAGACTTAGATAAACATGGAGCACTTACAAGCAGCAA

CACAGACACCACTAATGCTGATTGTGCTTGGCTGAGAGCACAGGAGGAGGAAGGAGAAGTAGGCTTTCCA

GTCACACCTCAGGTGCCTTTAAGACCAATGACTTATAAGAGCGCATTTGATCTCAGCTTCTTTTTAAAAG

AAAAGGGGGGACTGGAAGGGTTAATTTACTCTAAGAAAAGGCAAGAAATCCTTGATTTGTGGGTCTATCA

CACACAAGGCTTCTTCCCTGATTGGCAAAACTACACACCGGGACCAGGAGTCAGATACCCACTGACTTTT

GGGTGGTGCTTCAAGCTGGTACCAGTTGACCCAAGGGAAGTAGAAGAGGCCAACGAAGGAGAAGACAACT

GTTTGCTACACCCTGTGTGCCAGCATGGAATGGAGGATGAACACAGAGAAGTATTAAAGTGGAAGTTTGA

CAGTCAGCTAGCACGCACACACATGGCCCGCGAGCTACATCCGGAGTATTACAAAGACTGCTGA

>MT337381

MGGKWSKCSIVGWPAIRERMRRAEPAAEGVGAASQDLDKHGALTSSNTDTTNADCAWLRAQEEEGEVGFP

VTPQVPLRPMTYKSAFDLSFFLKEKGGLEGLIYSKKRQEILDLWVYHTQGFFPDWQNYTPGPGVRYPLTF

GWCFKLVPVDPREVEEANEGEDNCLLHPVCQHGMEDEHREVLKWKFDSQLARTHMARELHPEYYKDC

>MT337382.1 HIV-1 isolate IHDS-N9 from India nef protein (nef) gene, complete cds

ATGGGGGGCAAGTGGTCAAAAAGTAGCATAGTTGGATGGCCTGCTATAAGGGAGAGAATAAGACGAACTG

AGCCAGCAGCAGATGGGGTGGGAGCAGTATCTCAAGACCTGGAAAAACGTGGAGCAGTCACAAGTAGCAA

TACAGCAGCTACTAATGATGCTTGTGCCTGGCTAGAAGCACAAGAGGAGGAGGAGGTGGGTTTTCCAGTC

AGACCTCAGGTACCTTTAAGACCAATGACCTACAAGGGAGCTTTCGATCTTAGCTTCTTTTTAAAAGAAA

AGGGGGGACTGGAAGGGTTAATTTACTCCAGGAAAAGGCAAGAGATCCTTGATCTGTGGGTCTATAACAC

ACAAGGCTTCTTCCCTGATTGGCAAAACTACACACCAGGACCAGGGGTCAGATTCCCACTGACCTTTGGG

TGGTGCTTCAAGCTAGTACCAGTTGACCCAGGAGAAGTAGAAGAGGCCAACGAAGGAGAAGACAACAGCT

TGTTACACCCTATATGCCAGCATGGAATGGATGACCACCACAGAGAAGTGTTAAAGTGGCAGTTTGACAG

TCAGCTAGCATACAGACACAGAGCCCGCGAGCTACATCCGGAGTATTACAAAGACTGCTAA

>MT337382

MGGKWSKSSIVGWPAIRERIRRTEPAADGVGAVSQDLEKRGAVTSSNTAATNDACAWLEAQEEEEVGFPV

RPQVPLRPMTYKGAFDLSFFLKEKGGLEGLIYSRKRQEILDLWVYNTQGFFPDWQNYTPGPGVRFPLTFG

WCFKLVPVDPGEVEEANEGEDNSLLHPICQHGMDDHHREVLKWQFDSQLAYRHRARELHPEYYKDC

>MT337383.1 HIV-1 isolate IHDS-N10 from India nef protein (nef) gene, complete cds

ATGGGGGGCAAGTGGTCAAAACGCAGCTCAGGTGGATGGCCTGCTGTAAGAGAAAGAATGAGACAAACTA

AGGCAGCAGAAGGAGTAGGAGCAGCATCTCAAGACTTAGATAAACATGGAGCACTTACAAGCAGCAACAC

AGCCTCCAATAATCCTGATTGTGCTTGGCTGCAAGCGCAAGAAGAGGAAGGAGAAGTAGGCTTTCCAGTC

AGACCTCAGGTGCCTTTAAGACCAATGACATTTAAGGGAGCATTTGATCTCAGCTTCTTTTTAAAAGAAA

AGGGGGGACTGGAAGGGTTAATTTACTCTAAGAAAAGGCAAGAGATTCTTGATTTGTGGGTCTATCACAC

ACAAGGCTACTTCCCTGATTGGCAAAACTACACACCAGGACCAGGGGTCAGATACCCACTGACTTTTGGG

TGGTGTTTCAAGCTAGTACCAGTTGACCCAGGAGAAGTAGAAGAGGCCACCGGAGGAGAAGACAACTGTT

TGCTACACCCTGTGTGCCAGCATGGAATGGAGGATGAACACAGAGAAATATTAAAGTGGAAGTTTGATAG

TCACCTAGCATACAGACACTGGGCCCGCGAGCTGCATCCGGAGTATTACAAAGACTGCTGA

>MT337383

MGGKWSKRSSGGWPAVRERMRQTKAAEGVGAASQDLDKHGALTSSNTASNNPDCAWLQAQEEEGEVGFPV

RPQVPLRPMTFKGAFDLSFFLKEKGGLEGLIYSKKRQEILDLWVYHTQGYFPDWQNYTPGPGVRYPLTFG

WCFKLVPVDPGEVEEATGGEDNCLLHPVCQHGMEDEHREILKWKFDSHLAYRHWARELHPEYYKDC
